# Supplementary material for: Predictive power of extubation failure diagnosed by cough strength: a systematic review and meta-analysis
Source: PubMed Central journal article supplement (PMC8513306; doi:10.1186/s13054-021-03781-5), 2021-10-12
Supplement: 13054_2021_3781_MOESM2_ESM.pdf [file 13054_2021_3781_MOESM2_ESM.pdf]

### Weak cough tested by SCSS

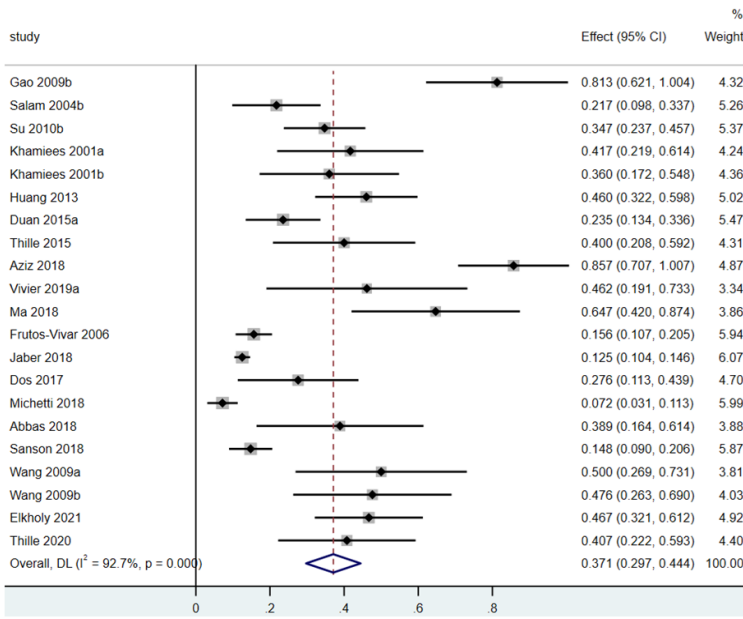

### Strong cough tested by SCSS

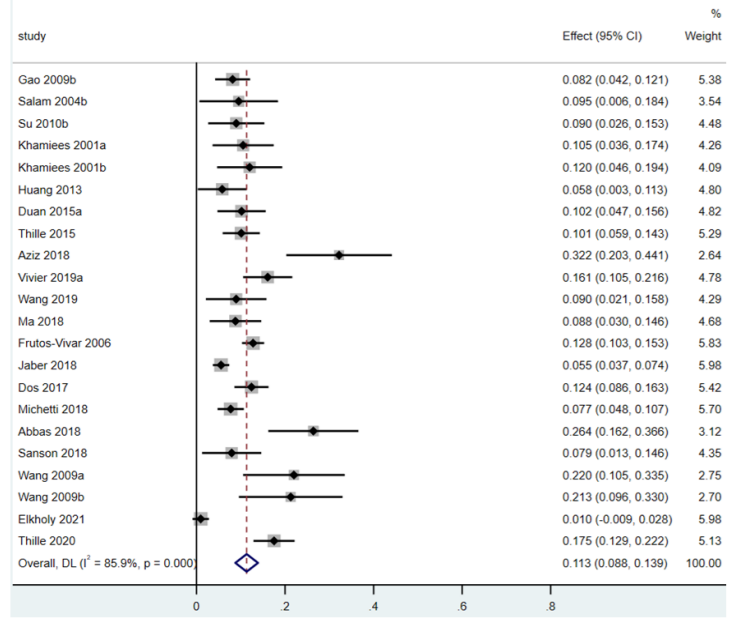

**Supplementary Figure 2.** Pooled extubation failure in patients with weak and strong cough tested by the semiquantitative cough strength score (SCSS). CI = confidence interval
