# Supplementary material for: Predictive power of extubation failure diagnosed by cough strength: a systematic review and meta-analysis
Source: PubMed Central journal article supplement (PMC8513306; doi:10.1186/s13054-021-03781-5), 2021-10-12
Supplement: 13054_2021_3781_MOESM6_ESM.pdf [file 13054_2021_3781_MOESM6_ESM.pdf]

### Univariable Meta-regression & Subgroup Analyses

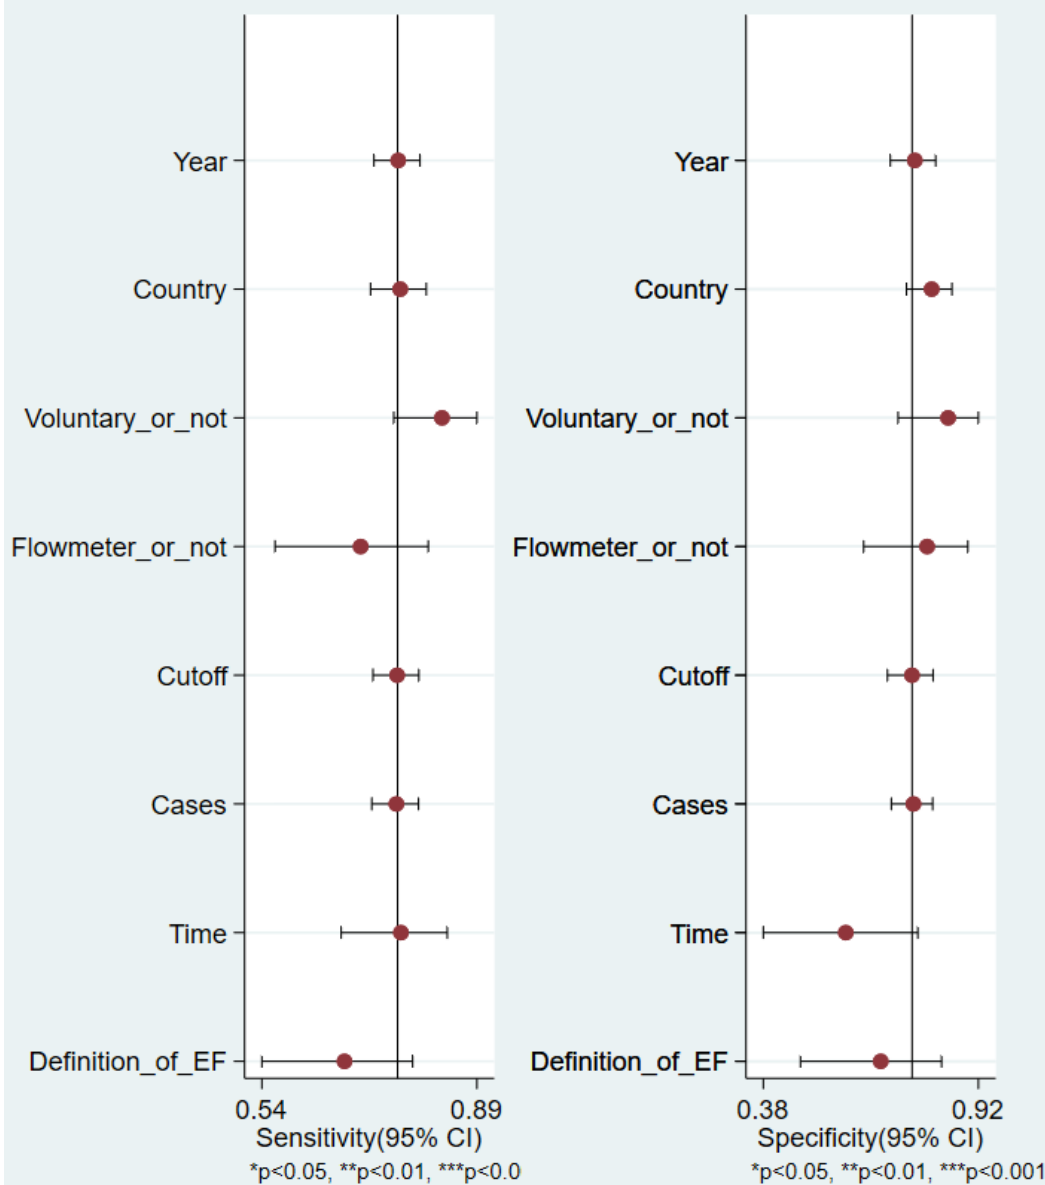

**Supplementary Figure 6.** Meta-regression analysis of studies that assessed cough peak flow (CPF). CI = confidence interval. Meta-regression was performed by publication year, country (China, France, United States, or other), voluntary or involuntary CPF, assessment of CPF with an external flowmeter or a ventilator, different cutoff values, number of cases in the study arm, time to extubation failure (EF) after the removal of the endotracheal tube ( $\leq 72$  h or  $>72$  h), and definition of EF (reintubation, death, or noninvasive ventilation).
