# Supplementary material for: Predictive power of extubation failure diagnosed by cough strength: a systematic review and meta-analysis
Source: PubMed Central journal article supplement (PMC8513306; doi:10.1186/s13054-021-03781-5), 2021-10-12
Supplement: 13054_2021_3781_MOESM9_ESM.pdf [file 13054_2021_3781_MOESM9_ESM.pdf]

### Univariable Meta-regression & Subgroup Analyses

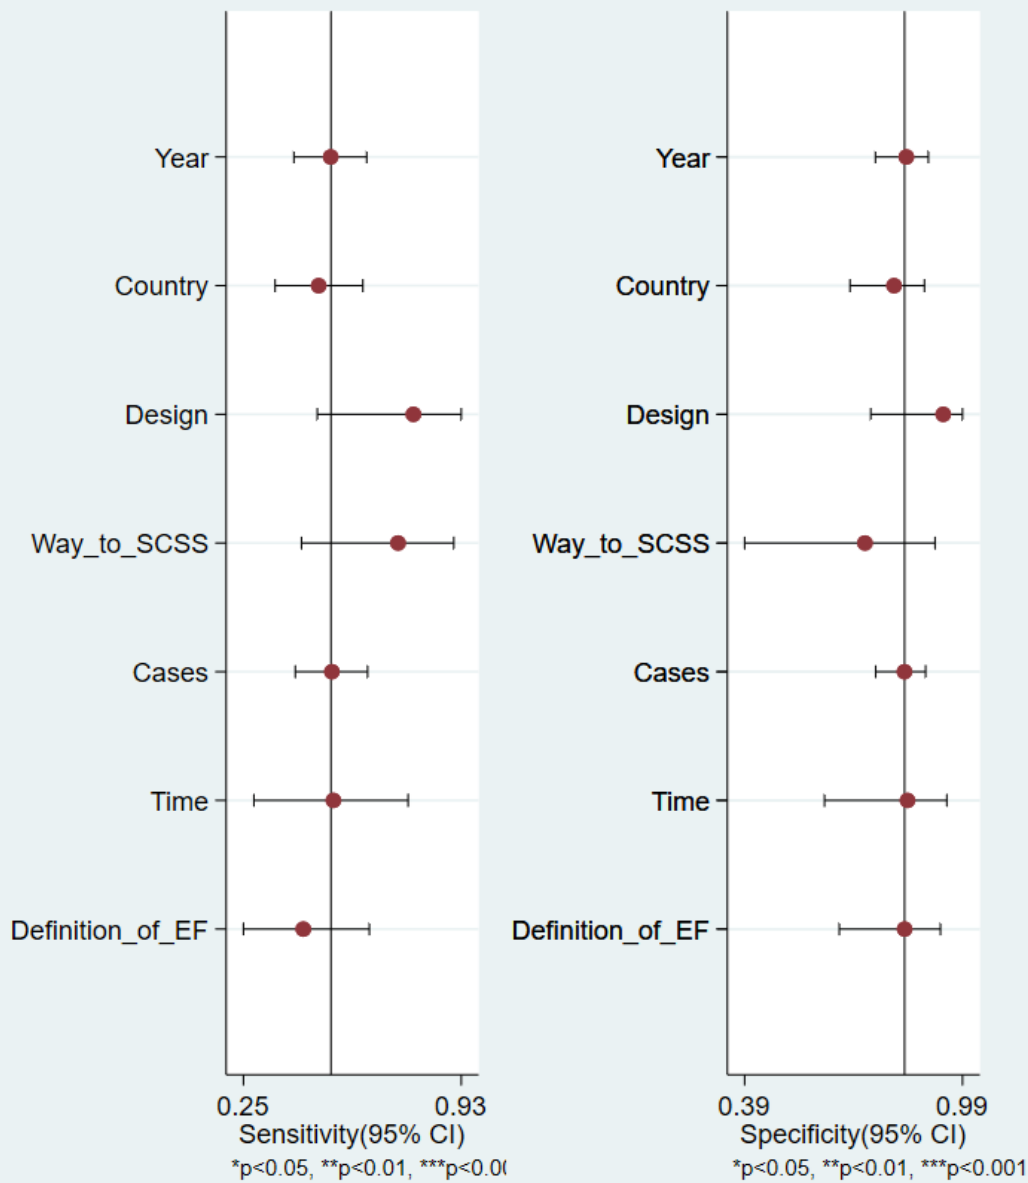

**Supplementary Figure 9.** Meta-regression analysis of studies that assessed the semiquantitative cough strength score (SCSS). CI = confidence interval. Meta-regression was performed by publication year, country (China, France, United States, or other), study design (prospective or retrospective), method of measuring the SCSS (white card test or not), number of cases in the study arm, time to extubation failure (EF) after the removal of the endotracheal tube ( $\leq 72$  h or  $>72$  h), and definition of EF (reintubation, death, or noninvasive ventilation).
