# Supplementary material for: Predictive power of extubation failure diagnosed by cough strength: a systematic review and meta-analysis
Source: PubMed Central journal article supplement (PMC8513306; doi:10.1186/s13054-021-03781-5), 2021-10-12
Supplement: 13054_2021_3781_MOESM11_ESM.pdf [file 13054_2021_3781_MOESM11_ESM.pdf]

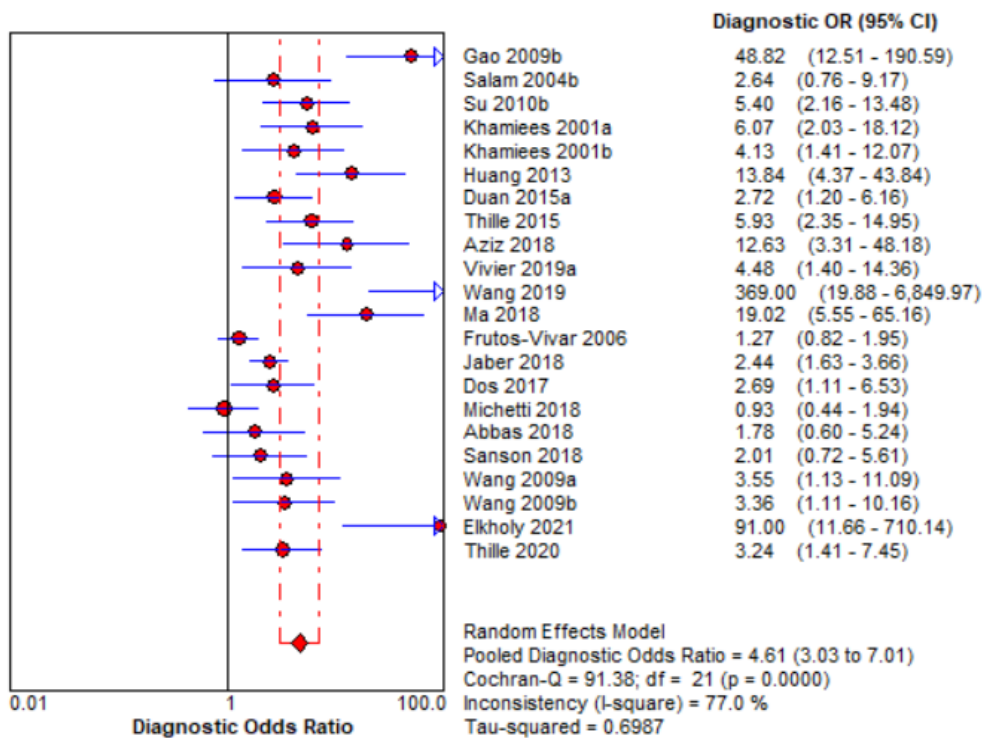

**Supplementary Figure 11.** Forest plot of the diagnostic odds ratio (OR) in the prediction of extubation failure tested by the semiquantitative cough strength score. CI = confidence interval
